# Supplementary material
Source: PubMed Central journal article supplement (PMC4633780)
Supplement: CJN.01640215_CJN01640215SupplementaryData.pdf [file CJN.01640215_CJN01640215SupplementaryData.pdf]

**Supplementary Table 1.** Criteria for covariates

| Variable                                             | Categorization                                                                                                                                                                                                                                                                                                                                                                                                                                                                        |
|------------------------------------------------------|---------------------------------------------------------------------------------------------------------------------------------------------------------------------------------------------------------------------------------------------------------------------------------------------------------------------------------------------------------------------------------------------------------------------------------------------------------------------------------------|
| <b>DM</b>                                            |                                                                                                                                                                                                                                                                                                                                                                                                                                                                                       |
| DM ICD-9                                             | 249, 249.0, 249.1, 249.2, 249.3, 249.4, 249.5, 249.6, 249.7, 249.8, 249.9, 250, 250.0, 250.00, 250.01, 250.02, 250.03, 250.1, 250.10, 250.11, 250.12, 250.13, 250.2, 250.20, 250.21, 250.22, 250.23, 250.3, 250.30, 250.31, 250.32, 250.33, 250.4, 250.40, 250.41, 250.42, 250.43, 250.5, 250.50, 250.51, 250.52, 250.53, 250.6, 250.60, 250.61, 250.62, 250.63, 250.7, 250.70, 250.71, 250.72, 250.73, 250.8, 250.80, 250.81, 250.82, 250.83, 250.9, 250.90, 250.91, 250.92, 250.93; |
| DM Meds<br>(based on patient's EHR medication list)  | Baseline use of any medication listed under Epicare therapeutic class "antihyperglycemic"                                                                                                                                                                                                                                                                                                                                                                                             |
| <b>HTN</b>                                           |                                                                                                                                                                                                                                                                                                                                                                                                                                                                                       |
| HTN ICD-9                                            | 401, 401.0, 401.1, 401.9, 401.9xx, 402, 402.0, 402.00, 402.01, 402.1, 402.10, 402.11, 402.9, 402.90, 402.91, 403, 403.00, 403.01, 403.1, 403.10, 403.11, 403.9, 403.90, 403.91, 404, 404.0, 404.00, 404.01, 404.02, 404.03, 404.1, 404.10, 404.11, 404.12, 404.13, 404.9, 404.90, 404.91, 404.92, 404.93, 405, 405.0, 405.01, 405.09, 405.1, 405.11, 405.19, 405.9, 405.91, 405.99, 437.2                                                                                             |
| HTN Meds<br>(based on patient's EHR medication list) | Baseline use of any medication under Epicare therapeutic class diuretics, or any medications under Epicare pharmaceutical classes:<br>(ANTIHYPERTENSIVES ACE INHIBITORS),<br>(ANTIHYPERTENSIVES ANGIOTENSIN RECEPTOR ANTAGONIST),<br>(BETA-ADRENERGIC BLOCKING AGENTS),<br>(ALPHA/BETA-ADRENERGIC BLOCKING AGENTS),<br>(CALCIUM CHANNEL BLOCKING AGENTS),<br>(ANTIHYPERTENSIVES, VASODILATORS),<br>(ANTIHYPERTENSIVES, SYMPATHOLYTIC)                                                 |
| <b>Dyslipidemia</b>                                  |                                                                                                                                                                                                                                                                                                                                                                                                                                                                                       |
| DL ICD-9                                             | 272.0, 272.1, 272.2, 272.3, 272.4, 272.9                                                                                                                                                                                                                                                                                                                                                                                                                                              |
| DL Meds<br>(based on patient's EHR medication list)  | Baseline use of any medications under Epicare pharmaceutical class: (ANTIHYPERLIP.HMG COA REDUCT INHIB&CHOLEST.AB.INHIB),                                                                                                                                                                                                                                                                                                                                                             |

|                       |                                                                                                                                                                                                                                                                                                                                                                                                                                                                                                                                                                                                                                                                                                                                                                  |
|-----------------------|------------------------------------------------------------------------------------------------------------------------------------------------------------------------------------------------------------------------------------------------------------------------------------------------------------------------------------------------------------------------------------------------------------------------------------------------------------------------------------------------------------------------------------------------------------------------------------------------------------------------------------------------------------------------------------------------------------------------------------------------------------------|
|                       | (ANTIHYPERLIPIDEMIC-HMG COA REDUCTASE INHIBITORS), (ANTIHYPERLIPIDEMIC-HMG COA REDUCTASE INHIB.&NIACIN), (BILE SALT SEQUESTRANTS), (NIACIN PREPARATIONS), (LIPOTROPICS)                                                                                                                                                                                                                                                                                                                                                                                                                                                                                                                                                                                          |
| <b>Cardiovasc Dsz</b> | Presence of CAD, cerebrovasc dsz, or PAD                                                                                                                                                                                                                                                                                                                                                                                                                                                                                                                                                                                                                                                                                                                         |
| CAD                   | 410, 410.0, 410.00, 410.01, 410.02, 410.1, 410.10, 410.11, 410.12, 410.2, 410.20, 410.21, 410.22, 410.3, 410.30, 410.31, 410.32, 410.4, 410.40, 410.41, 410.42, 410.5, 410.50, 410.51, 410.52, 410.6, 410.60, 410.61, 410.62, 410.7, 410.70, 410.71, 401.72, 410.8, 410.80, 410.81, 410.82, 410.9, 410.90, 410.91, 410.92, 411, 411.0, 411.1, 411.8, 411.81, 411.89, 412, 413, 413.0, 413.1, 413.9, 414, 414.0, 414.00, 414.01, 414.02, 414.03, 414.04, 414.05, 414.06, 414.07, 414.1, 414.10, 414.11, 414.12, 414.19, 414.2, 414.3, 414.8, 414.9, 36.01 36.02, 36.05, 36.06, 36.09, 36.10, 36.11, 36.12, 36.13, 36.14, 36.15, 36.16, 36.17, 36.19, 996.72C, V45.82, V45.82x, V45.82xx V45.89AXH, V45.09L, 996.72D, 996.72E, V45.09K, V45.81, V45.81xx, 414.05L, |
| Cerebrovasc Dsz       | 430, 431, 433.0, 433.00, 433.01, 433.1, 433.10, 433.11, 433.2, 433.20, 433.21, 433.3, 433.30, 433.31, 433.8, 433.80, 433.81, 433.9, 433.90, 433.91, 434.0, 434.00, 434.01, 434.1, 434.10, 434.11, 434.9, 434.90, 434.91, 435.0, 435.1, 435.3, 435.8, 435.9, 436, 437.0, 437.1, 437.3, 437.9, 438, 438.0, 438.10, 438.11, 438.12, 438.13, 438.14, 438.19, 438.20, 438.21, 438.22, 438.30, 438.31, 438.32, 438.40, 438.41, 438.42, 438.50, 438.51, 438.52, 438.53, 438.6, 438.7, 438.81, 438.81, 438.82, 438.83, 438.84, 438.85, 438.89, 438.9, 996.74H, 996.74J,                                                                                                                                                                                                  |
| PAD/PVD               | 250.70, 250.71, 250.72, 440.0, 440.1, 440.20, 440.21, 440.22, 440.23, 440.24, 440.29, 440.30, 440.31, 440.32, 440.4, 440.8, 440.9, 443.81, 443.89, 443.9, V43.4K, V43.4L, V45.89XJ, V45.89XH, 996.74AP, 440.30, 440.30x, 440.30xx, 996.74S, 996.74U, 996.74AE, 996.74AG, 996.74W, 996.74Z, 996.74AK, V45.89FA, V45.89APW, 440.30, 440.30x, 440.30xx, V45.89AXD                                                                                                                                                                                                                                                                                                                                                                                                   |
| <b>CHF</b>            | 428.0, 428.1, 428.20, 428.21, 428.22, 428.23, 428.30,                                                                                                                                                                                                                                                                                                                                                                                                                                                                                                                                                                                                                                                                                                            |

|                                                          |                                                                                                                                                |
|----------------------------------------------------------|------------------------------------------------------------------------------------------------------------------------------------------------|
|                                                          | 428.31, 428.32, 428.33, 428.40, 428.41, 428.42, 428.43, 428.9                                                                                  |
| <b>Nephrolithiasis</b>                                   | 592, 592.x, 594, 594.x,                                                                                                                        |
| <b>CKD stage ICD-9</b>                                   | 585.1 stage 1<br>585.2 stage 2<br>585.3 stage 3<br>585.4 stage 4<br>585.5 stage 5<br>585.6 end-stage, stage 6<br>585.9 CKD unspecified—stage 7 |
| <b>Kidney Transplant</b>                                 | V42.0 or<br>an office visit with encounter location unique to the post-Kidney Transplant clinic                                                |
| <b>Tobacco use</b>                                       |                                                                                                                                                |
| Tobacco ICD-9                                            | V15.82, v65.49, 305.1                                                                                                                          |
| Tobacco Meds<br>(based on patient's EHR medication list) | Baseline use of the following medications:<br><br>"Varenicline" or any medication of the Epicare therapeutic class: "SMOKING DETERRENTS"       |
| Tobacco Social History                                   | The most recent smoking status recorded in the <b>social history section</b> ("current every day smoker", "current some day smoker")           |
| Dementia                                                 | 290*, 331.2                                                                                                                                    |
| Chronic lung disease                                     | 416.8, 416.9, 490*, 491*, 492*, 493*, 494*, 495*, 496*, 500*, 501*, 502*, 503*, 504*, 505*, 506.4, 508.1, 508.8                                |
| Connective tissue disease                                | 446.5, 710.0-710.4, 714.0, 714.1, 714.2, 714.8*, 725                                                                                           |
| Peptic ulcer disease                                     | 531*, 532*, 533*, 534*                                                                                                                         |
| Mild liver disease                                       | 571.2, 571.4, 571.4*, 571.5, 571.6                                                                                                             |
| Moderate to severe liver disease                         | 456, 456.0, 456.1, 456.2, 456.2*, 572.2, 572.3, 572.4, 572.5, 572.6, 572.7, 572.8,                                                             |

|                                                          |                                                                                                                                                                                                                                                                                                                                                                                                                                 |
|----------------------------------------------------------|---------------------------------------------------------------------------------------------------------------------------------------------------------------------------------------------------------------------------------------------------------------------------------------------------------------------------------------------------------------------------------------------------------------------------------|
| Hemiplegia/quadriplegia                                  | 344.1, 342, 342.0*, 342.1*, 342.8*, 342.9*                                                                                                                                                                                                                                                                                                                                                                                      |
| Malignancy                                               | 140*, 141*, 142*, 143*, 144*, 145*, 146*, 147*, 148*, 149*, 150*, 151*, 152*, 153*, 154*, 155*, 156*, 157*, 158*, 159*, 160*, 161*, 162*, 163*, 164*, 165*, 166*, 167*, 168*, 169*, 170*, 172*, 174*, 175*, 176*, 177*, 178*, 179*, 180*, 181*, 182*, 183*, 184*, 185*, 186*, 187*, 188*, 189*, 190*, 191*, 192*, 193*, 194*, 195*, 200*, 201*, 202*, 203*, 204*, 205*, 206*, 207*, 208, 208.0*, 208.1*, 208.2*, 208.8*, 208.9* |
| Metastatic disease                                       | 196*, 197*, 198*, 199, 199.0, 199.1                                                                                                                                                                                                                                                                                                                                                                                             |
| AIDS                                                     | 042                                                                                                                                                                                                                                                                                                                                                                                                                             |
| ACEi/ARB use<br>(based on patient's EHR medication list) | Baseline use of any medication under the Epicare pharmaceutical class (ANTIHYPERTENSIVES ACE INHIBITORS), (ANTIHYPERTENSIVES ANGIOTENSIN RECEPTOR ANTAGONIST),                                                                                                                                                                                                                                                                  |

**Supplementary Table 2.** Associations with electronic health record portal use

|                                                                                        | <b>OR (95%CI)</b>  |
|----------------------------------------------------------------------------------------|--------------------|
| Charleston Comorbidity Index (5 points vs. 3 points) <sup>†</sup>                      | 1.00 (0.89 – 1.14) |
| University-affiliated PCP (vs. non-University PCP)                                     | 1.94 (1.60 – 2.35) |
| Nephrology visits (6 vs. 2 visits) <sup>†</sup>                                        | 1.52 (1.26 – 1.83) |
| University-affiliated outpatient visits, non-nephrology (4 vs. 12 visits) <sup>†</sup> | 1.18 (1.05 – 1.34) |
| Follow-up time (3 vs. 1 year)*                                                         | 1.10 (0.93 – 1.28) |

Odds ratios are adjusted for age, sex, race, marital status, insurance status, neighborhood median HH income, tobacco use, length of follow-up, hyperlipidemia, nephrolithiasis, history of kidney transplant, Charlson Comorbidity Index, proteinuria, eGFR, number of nephrology visits, number of non-nephrology outpatient visits, and University-affiliated PCP

<sup>†</sup>The reported odds ratio is comparison specific due to non-linear effects.

\*The reported odds ratio is comparison specific due to natural logarithmic transformation.

OR odds ratio, CI confidence interval, PCP primary care provider

**Supplemental Table 3.** Proportion of population contributing BP values to the analysis

|         | Overall Cohort | Portal Users | Non-users    | P-Value |
|---------|----------------|--------------|--------------|---------|
|         | N = 2473 (%)   | N = 973 (%)  | N = 1500 (%) |         |
| <6mo    | 2049 (83)      | 795 (82)     | 1254 (84)    | 0.2     |
| 6-12mo  | 2092 (85)      | 852 (88)     | 1240 (83)    | 0.001   |
| 12-18mo | 1842 (74)      | 766 (79)     | 1076 (72)    | <0.001  |
| 18-24mo | 1573 (64)      | 694 (71)     | 879 (59)     | <0.001  |
| 24-30mo | 1336 (54)      | 596 (61)     | 740 (49)     | <0.001  |
| 30-36mo | 1137 (46)      | 505 (52)     | 632 (42)     | <0.001  |
| >36mo   | 905 (37)       | 424 (44)     | 481 (32)     | <0.001  |

Results represent N (%). P-values from Chi-square test.

**Supplemental Table 4.** Number of BP measures per unique patient with at least 1 measurement during the specified time interval

|         | Cohort Mean | Cohort Median | Users Mean | Users Median | Non-users Mean | Non-users Median | P-Value |
|---------|-------------|---------------|------------|--------------|----------------|------------------|---------|
| <6mo    | 3.9 (3.1)   | 3.0 (2-5)     | 4.0 (3.1)  | 3.0 (2-5)    | 3.8 (3.1)      | 3.0 (2-5)        | 0.2     |
| 6-12mo  | 3.4 (2.7)   | 3.0 (1-5)     | 3.5 (2.8)  | 3.0 (2-5)    | 3.4 (2.7)      | 3.0 (1-4)        | 0.2     |
| 12-18mo | 3.2 (2.6)   | 2.0 (1-4)     | 3.4 (2.7)  | 3.0 (1-4)    | 3.1 (2.6)      | 2.0 (1-4)        | 0.02    |
| 18-24mo | 3.5 (2.8)   | 3.0 (1-5)     | 3.6 (2.9)  | 3.0 (2-5)    | 3.3 (2.7)      | 2.0 (1-4)        | 0.008   |
| 24-30mo | 3.4 (3.0)   | 3.0 (1-4)     | 3.5 (3.2)  | 3.0 (2-4)    | 3.3 (2.8)      | 2.0 (1-4)        | 0.1     |
| 30-36mo | 3.5 (3.0)   | 3.0 (1-5)     | 3.7 (3.0)  | 3.0 (2-5)    | 3.4 (2.9)      | 3.0 (1-4)        | 0.01    |
| >36mo   | 3.6 (3.1)   | 3.0 (1-5)     | 3.8 (3.1)  | 3.0 (2-5)    | 3.5 (3.1)      | 3.0 (1-5)        | <0.001  |

Results represent mean and (SD) or medians and (IQR). P-values from Wilcoxon–Mann–Whitney test.

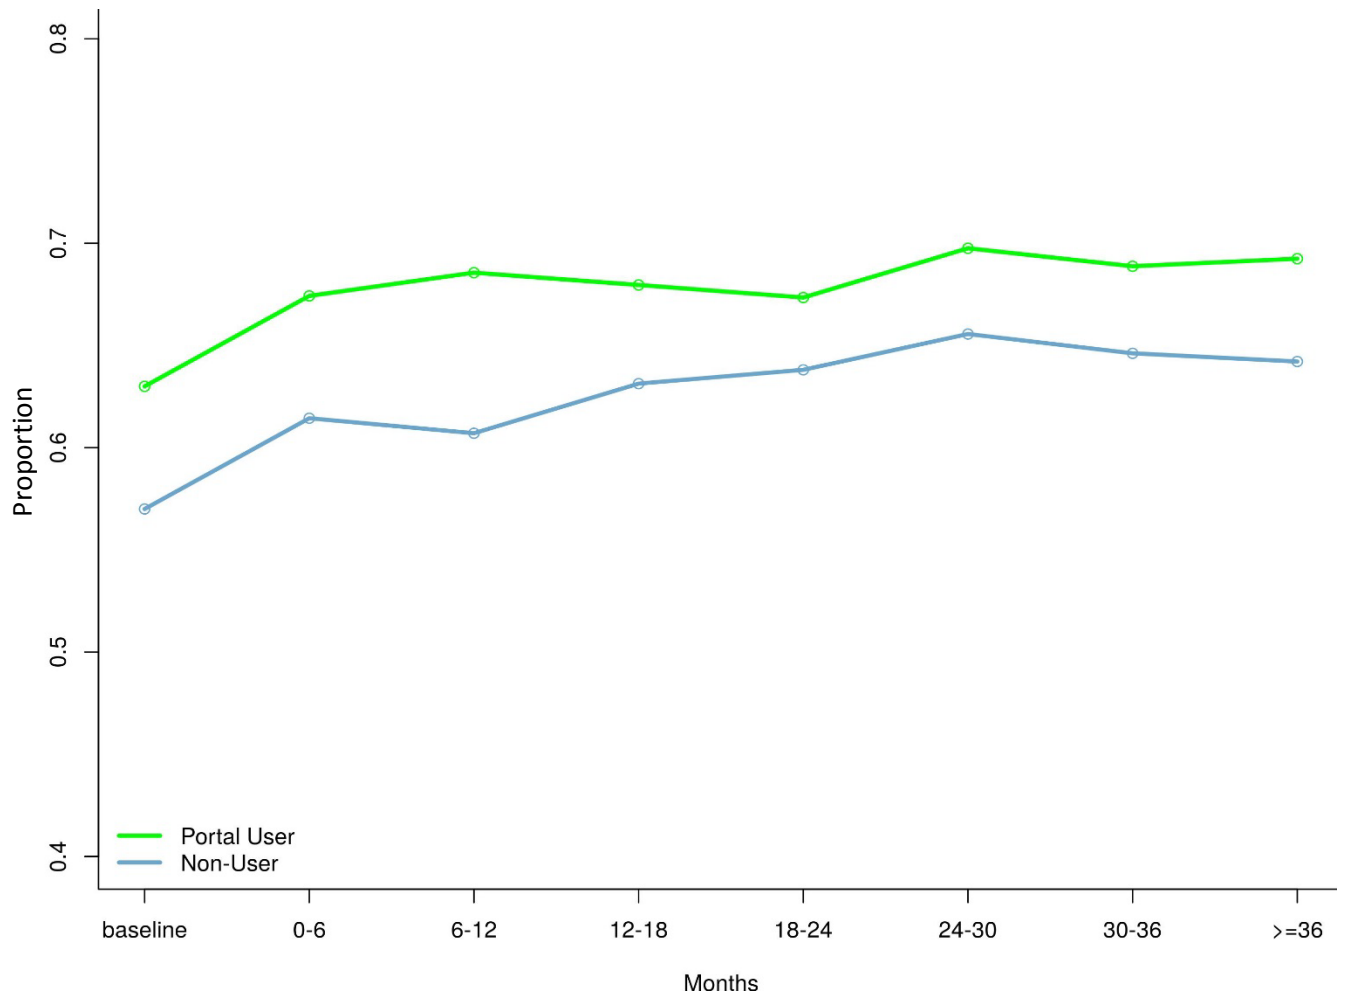

**Supplementary Figure 1.** Median proportion of blood pressures at goal over time

Baseline value represents proportion of baseline blood pressure values (1 per patient) that were at goal. All other values represent the median of the proportion of blood pressure values at goal for patients with at least 1 blood pressure during the specified interval.
